# Supplementary material for: Bid Expression Network Controls Neuronal Cell Fate During Avian Ciliary Ganglion Development
Source: Front Physiol. 2018 Jun 29;9:797. doi: 10.3389/fphys.2018.00797 (PMC6034111; doi:10.3389/fphys.2018.00797)
Supplement: Supplementary file 1 [file Table_1.XLSX]

## Sheet: I
GOBPID	Pvalue	OddsRatio	ExpCount	Count	Size	Term
GO:0002377	7.19011e-08	245.167	0.0538721	4	10	immunoglobulin production
GO:0002700	7.19011e-08	245.167	0.0538721	4	10	regulation of production of molecular mediator of immune response
GO:0060548	9.8828e-08	77.5636	0.32862	6	61	negative regulation of cell death
GO:0002285	1.68747e-07	183.625	0.0646465	4	12	lymphocyte activation involved in immune response
GO:0002263	6.15076e-07	122.083	0.0861953	4	16	cell activation involved in immune response
GO:0002262	8.02582e-07	112.615	0.0915825	4	17	myeloid cell homeostasis
GO:0043067	9.99934e-07	50.3855	0.479461	6	89	regulation of programmed cell death
GO:0002208	1.02291e-06	442.5	0.026936	3	5	somatic diversification of immunoglobulins involved in immune response
GO:0050871	1.02291e-06	442.5	0.026936	3	5	positive regulation of B cell activation
GO:0016064	2.04064e-06	294.8	0.0323232	3	6	immunoglobulin mediated immune response
GO:0016447	2.04064e-06	294.8	0.0323232	3	6	somatic recombination of immunoglobulin gene segments
GO:0043066	2.72429e-06	48.5714	0.290909	5	54	negative regulation of apoptotic process
GO:0048534	3.58817e-06	45.6731	0.307071	5	57	hematopoietic or lymphoid organ development
GO:0032946	5.68486e-06	176.64	0.0430976	3	8	positive regulation of mononuclear cell proliferation
GO:0046427	5.68486e-06	176.64	0.0430976	3	8	positive regulation of JAK-STAT cascade
GO:0010942	6.74085e-06	60.5417	0.150842	4	28	positive regulation of cell death
GO:0016265	7.72178e-06	34.2353	0.673401	6	125	death
GO:0002449	8.50568e-06	147.1	0.0484848	3	9	lymphocyte mediated immunity
GO:0002200	1.66229e-05	110.175	0.0592593	3	11	somatic diversification of immune receptors
GO:0016444	1.66229e-05	110.175	0.0592593	3	11	somatic cell DNA recombination
GO:0050670	1.66229e-05	110.175	0.0592593	3	11	regulation of lymphocyte proliferation
GO:0070663	2.21077e-05	97.8667	0.0646465	3	12	regulation of leukocyte proliferation
GO:0001781	2.54113e-05	Inf	0.0107744	2	2	neutrophil apoptotic process
GO:0050863	2.8667e-05	88.02	0.0700337	3	13	regulation of T cell activation
GO:0002696	3.63926e-05	79.9636	0.0754209	3	14	positive regulation of leukocyte activation
GO:0033138	3.63926e-05	79.9636	0.0754209	3	14	positive regulation of peptidyl-serine phosphorylation
GO:0018209	4.53752e-05	73.25	0.0808081	3	15	peptidyl-serine modification
GO:0002712	7.60284e-05	492	0.0161616	2	3	regulation of B cell mediated immunity
GO:0045191	7.60284e-05	492	0.0161616	2	3	regulation of isotype switching
GO:0050755	7.60284e-05	492	0.0161616	2	3	chemokine metabolic process
GO:0051023	7.60284e-05	492	0.0161616	2	3	regulation of immunoglobulin secretion
GO:0009914	8.0757e-05	58.48	0.0969697	3	18	hormone transport
GO:0045595	9.13463e-05	22.0032	0.587205	5	109	regulation of cell differentiation
GO:0050865	0.000112249	51.5294	0.107744	3	20	regulation of cell activation
GO:0008284	0.000139945	25.8545	0.317845	4	59	positive regulation of cell proliferation
GO:0002682	0.000149608	25.375	0.323232	4	60	regulation of immune system process
GO:0001776	0.000151647	245.833	0.0215488	2	4	leukocyte homeostasis
GO:0032602	0.000151647	245.833	0.0215488	2	4	chemokine production
GO:0032735	0.000151647	245.833	0.0215488	2	4	positive regulation of interleukin-12 production
GO:0043065	0.000159744	47.413	0.122642	3	26	positive regulation of apoptotic process
GO:0006952	0.00019321	23.6167	0.344781	4	64	defense response
GO:0034097	0.000197268	41.6	0.129293	3	24	response to cytokine
GO:0051649	0.000249547	17.416	0.721886	5	134	establishment of localization in cell
GO:0042102	0.000252062	163.778	0.026936	2	5	positive regulation of T cell proliferation
GO:0042832	0.000252062	163.778	0.026936	2	5	defense response to protozoan
GO:0045619	0.000252062	163.778	0.026936	2	5	regulation of lymphocyte differentiation
GO:1902107	0.000252062	163.778	0.026936	2	5	positive regulation of leukocyte differentiation
GO:0023061	0.000252116	37.9304	0.140067	3	26	signal release
GO:0031401	0.000275113	21.3788	0.377104	4	70	positive regulation of protein modification process
GO:0042327	0.000290887	21.0448	0.382492	4	71	positive regulation of phosphorylation
GO:0051223	0.000351613	33.4846	0.156229	3	29	regulation of protein transport
GO:0000060	0.000377073	122.75	0.0323232	2	6	protein import into nucleus, translocation
GO:0050714	0.000377073	122.75	0.0323232	2	6	positive regulation of protein secretion
GO:0071222	0.000377073	122.75	0.0323232	2	6	cellular response to lipopolysaccharide
GO:0019220	0.000377251	15.792	0.786532	5	146	regulation of phosphate metabolic process
GO:0002460	0.000378086	122.583	0.0323668	2	8	adaptive immune response based on somatic recombination of immune receptors built from immunoglobulin superfamily domains
GO:0010562	0.000399743	19.2329	0.414815	4	77	positive regulation of phosphorus metabolic process
GO:0051247	0.000420409	18.9595	0.420202	4	78	positive regulation of protein metabolic process
GO:0097285	0.000430332	31.05	0.167003	3	31	cell-type specific apoptotic process
GO:0001932	0.000487065	18.1818	0.436364	4	81	regulation of protein phosphorylation
GO:0002699	0.000526478	98.1333	0.0377104	2	7	positive regulation of immune effector process
GO:0002703	0.000526478	98.1333	0.0377104	2	7	regulation of leukocyte mediated immunity
GO:0002819	0.000526478	98.1333	0.0377104	2	7	regulation of adaptive immune response
GO:0032675	0.000526478	98.1333	0.0377104	2	7	regulation of interleukin-6 production
GO:0042089	0.000700076	81.7222	0.0430976	2	8	cytokine biosynthetic process
GO:0042100	0.000700076	81.7222	0.0430976	2	8	B cell proliferation
GO:0046631	0.000700076	81.7222	0.0430976	2	8	alpha-beta T cell activation
GO:0071216	0.000700076	81.7222	0.0430976	2	8	cellular response to biotic stimulus
GO:0042592	0.000765033	15.977	0.490236	4	91	homeostatic process
GO:0009611	0.000924295	23.3514	0.215488	3	40	response to wounding
GO:0051240	0.000924295	23.3514	0.215488	3	40	positive regulation of multicellular organismal process
GO:0032880	0.00106847	22.1231	0.226263	3	42	regulation of protein localization
GO:0002237	0.00111905	61.2083	0.0538721	2	10	response to molecule of bacterial origin
GO:0051607	0.00111905	61.2083	0.0538721	2	10	defense response to virus
GO:0045184	0.00123168	13.9192	0.554882	4	103	establishment of protein localization
GO:0032502	0.0012816	16.4977	2.40808	7	447	developmental process
GO:0001818	0.00136404	54.3704	0.0592593	2	11	negative regulation of cytokine production
GO:0002790	0.00136404	54.3704	0.0592593	2	11	peptide secretion
GO:0050731	0.00136404	54.3704	0.0592593	2	11	positive regulation of peptidyl-tyrosine phosphorylation
GO:0018212	0.00139838	20.0093	0.247811	3	46	peptidyl-tyrosine modification
GO:1902531	0.00147609	13.2019	0.581818	4	108	regulation of intracellular signal transduction
GO:0071310	0.00152884	13.0667	0.587205	4	109	cellular response to organic substance
GO:0048583	0.00184017	10.7035	1.09899	5	204	regulation of response to stimulus
GO:0019221	0.00192402	44.4242	0.0700337	2	13	cytokine-mediated signaling pathway
GO:0030183	0.00192402	44.4242	0.0700337	2	13	B cell differentiation
GO:0048731	0.0019396	10.934	1.74545	6	324	system development
GO:0030218	0.00223862	40.6944	0.0754209	2	14	erythrocyte differentiation
GO:0033002	0.00223862	40.6944	0.0754209	2	14	muscle cell proliferation
GO:0042886	0.00223862	40.6944	0.0754209	2	14	amide transport
GO:0046883	0.00223862	40.6944	0.0754209	2	14	regulation of hormone secretion
GO:0050727	0.00223862	40.6944	0.0754209	2	14	regulation of inflammatory response
GO:1901700	0.00236135	16.4423	0.296296	3	55	response to oxygen-containing compound
GO:0032501	0.00259671	14.1	2.67744	7	497	multicellular organismal process
GO:0032268	0.00272567	11.0081	0.684175	4	127	regulation of cellular protein metabolic process
GO:0045926	0.00293609	34.8333	0.0861953	2	16	negative regulation of growth
GO:0051052	0.0037233	30.4375	0.0969697	2	18	regulation of DNA metabolic process
GO:0044700	0.00387287	9.27424	1.9771	6	367	single organism signaling
GO:0002292	0.00404858	Inf	0.00404858	1	1	T cell differentiation involved in immune response
GO:0044744	0.00415008	28.6275	0.102357	2	19	protein targeting to nucleus
GO:1902593	0.00415008	28.6275	0.102357	2	19	single-organism nuclear import
GO:0048869	0.00439173	25.6403	0.426747	3	142	cellular developmental process
GO:0048518	0.00447693	18.4125	0.903114	4	261	positive regulation of biological process
GO:0007154	0.00448967	8.9434	2.03098	6	377	cell communication
GO:0002521	0.00459754	28.98	0.109459	2	27	leukocyte differentiation
GO:0017038	0.00459873	27.0185	0.107744	2	20	protein import
GO:0071702	0.00470268	9.32867	0.791919	4	147	organic substance transport
GO:0002828	0.00471698	Inf	0.00471698	1	1	regulation of type 2 immune response
GO:0042742	0.00506906	25.5789	0.113131	2	21	defense response to bacterium
GO:0001953	0.00538721	Inf	0.00538721	1	1	negative regulation of cell-matrix adhesion
GO:0002302	0.00538721	Inf	0.00538721	1	1	CD8-positive, alpha-beta T cell differentiation involved in immune response
GO:0002467	0.00538721	Inf	0.00538721	1	1	germinal center formation
GO:0002675	0.00538721	Inf	0.00538721	1	1	positive regulation of acute inflammatory response
GO:0002829	0.00538721	Inf	0.00538721	1	1	negative regulation of type 2 immune response
GO:0007350	0.00538721	Inf	0.00538721	1	1	blastoderm segmentation
GO:0008595	0.00538721	Inf	0.00538721	1	1	anterior/posterior axis specification, embryo
GO:0031642	0.00538721	Inf	0.00538721	1	1	negative regulation of myelination
GO:0032113	0.00538721	Inf	0.00538721	1	1	regulation of carbohydrate phosphatase activity
GO:0032732	0.00538721	Inf	0.00538721	1	1	positive regulation of interleukin-1 production
GO:0032764	0.00538721	Inf	0.00538721	1	1	negative regulation of mast cell cytokine production
GO:0032966	0.00538721	Inf	0.00538721	1	1	negative regulation of collagen biosynthetic process
GO:0034393	0.00538721	Inf	0.00538721	1	1	positive regulation of smooth muscle cell apoptotic process
GO:0035409	0.00538721	Inf	0.00538721	1	1	histone H3-Y41 phosphorylation
GO:0042977	0.00538721	Inf	0.00538721	1	1	activation of JAK2 kinase activity
GO:0043372	0.00538721	Inf	0.00538721	1	1	positive regulation of CD4-positive, alpha-beta T cell differentiation
GO:0043373	0.00538721	Inf	0.00538721	1	1	CD4-positive, alpha-beta T cell lineage commitment
GO:0043380	0.00538721	Inf	0.00538721	1	1	regulation of memory T cell differentiation
GO:0044252	0.00538721	Inf	0.00538721	1	1	negative regulation of multicellular organismal metabolic process
GO:0045079	0.00538721	Inf	0.00538721	1	1	negative regulation of chemokine biosynthetic process
GO:0045410	0.00538721	Inf	0.00538721	1	1	positive regulation of interleukin-6 biosynthetic process
GO:0045622	0.00538721	Inf	0.00538721	1	1	regulation of T-helper cell differentiation
GO:0045630	0.00538721	Inf	0.00538721	1	1	positive regulation of T-helper 2 cell differentiation
GO:0045662	0.00538721	Inf	0.00538721	1	1	negative regulation of myoblast differentiation
GO:0045672	0.00538721	Inf	0.00538721	1	1	positive regulation of osteoclast differentiation
GO:0048294	0.00538721	Inf	0.00538721	1	1	negative regulation of isotype switching to IgE isotypes
GO:0048662	0.00538721	Inf	0.00538721	1	1	negative regulation of smooth muscle cell proliferation
GO:0050718	0.00538721	Inf	0.00538721	1	1	positive regulation of interleukin-1 beta secretion
GO:0051044	0.00538721	Inf	0.00538721	1	1	positive regulation of membrane protein ectodomain proteolysis
GO:0051353	0.00538721	Inf	0.00538721	1	1	positive regulation of oxidoreductase activity
GO:0051712	0.00538721	Inf	0.00538721	1	1	positive regulation of killing of cells of other organism
GO:0060550	0.00538721	Inf	0.00538721	1	1	positive regulation of fructose 1,6-bisphosphate 1-phosphatase activity
GO:0060552	0.00538721	Inf	0.00538721	1	1	positive regulation of fructose 1,6-bisphosphate metabolic process
GO:0060557	0.00538721	Inf	0.00538721	1	1	positive regulation of vitamin D biosynthetic process
GO:0060559	0.00538721	Inf	0.00538721	1	1	positive regulation of calcidiol 1-monooxygenase activity
GO:0070091	0.00538721	Inf	0.00538721	1	1	glucagon secretion
GO:0071351	0.00538721	Inf	0.00538721	1	1	cellular response to interleukin-18
GO:0071550	0.00538721	Inf	0.00538721	1	1	death-inducing signaling complex assembly
GO:0072538	0.00538721	Inf	0.00538721	1	1	T-helper 17 type immune response
GO:0072540	0.00538721	Inf	0.00538721	1	1	T-helper 17 cell lineage commitment
GO:1902042	0.00538721	Inf	0.00538721	1	1	negative regulation of extrinsic apoptotic signaling pathway via death domain receptors
GO:2000309	0.00538721	Inf	0.00538721	1	1	positive regulation of tumor necrosis factor (ligand) superfamily member 11 production
GO:2000353	0.00538721	Inf	0.00538721	1	1	positive regulation of endothelial cell apoptotic process
GO:0048468	0.00558371	8.84667	0.82963	4	154	cell development
GO:0033036	0.00599426	8.65359	0.845791	4	157	macromolecule localization
GO:0045190	0.0080835	295	0.00809717	1	2	isotype switching
GO:0009967	0.00849891	10.0771	0.4633	3	86	positive regulation of signal transduction
GO:0031327	0.00877949	9.95	0.468687	3	87	negative regulation of cellular biosynthetic process
GO:0002293	0.00941488	246	0.00943396	1	2	alpha-beta T cell differentiation involved in immune response
GO:0045073	0.00941488	246	0.00943396	1	2	regulation of chemokine biosynthetic process
GO:0051704	0.00965478	9.58621	0.484848	3	90	multi-organism process
GO:0048519	0.00981134	9.704	1.03744	4	254	negative regulation of biological process

## Sheet: II
GOBPID	Pvalue	OddsRatio	ExpCount	Count	Size	Term
GO:0043065	3.19767e-07	66.0455	0.181818	5	27	positive regulation of apoptotic process
GO:0010942	3.88173e-07	63.1304	0.188552	5	28	positive regulation of cell death
GO:2001056	1.81157e-05	104.929	0.0606061	3	9	positive regulation of cysteine-type endopeptidase activity
GO:0010952	2.57878e-05	89.8776	0.0673401	3	10	positive regulation of peptidase activity
GO:0008219	4.66301e-05	69.6923	0.284327	4	82	cell death
GO:0097193	6.08084e-05	62.7857	0.0875421	3	13	intrinsic apoptotic signaling pathway
GO:0042771	0.000122078	368.5	0.020202	2	3	intrinsic apoptotic signaling pathway in response to DNA damage by p53 class mediator
GO:0043281	0.000170433	41.7143	0.121212	3	18	regulation of cysteine-type endopeptidase activity involved in apoptotic process
GO:0010821	0.000243279	184.125	0.026936	2	4	regulation of mitochondrion organization
GO:0007346	0.00036336	31.1786	0.154882	3	23	regulation of mitotic cell cycle
GO:0006919	0.000404006	122.667	0.03367	2	5	activation of cysteine-type endopeptidase activity involved in apoptotic process
GO:0031638	0.000404006	122.667	0.03367	2	5	zymogen activation
GO:0044772	0.000413788	29.6735	0.161616	3	24	mitotic cell cycle phase transition
GO:2000045	0.000603829	91.9375	0.040404	2	6	regulation of G1/S transition of mitotic cell cycle
GO:0052548	0.000660245	24.8571	0.188552	3	28	regulation of endopeptidase activity
GO:0010332	0.00084232	73.5	0.047138	2	7	response to gamma radiation
GO:0046902	0.00084232	73.5	0.047138	2	7	regulation of mitochondrial membrane permeability
GO:0010564	0.000985437	21.3695	0.215488	3	32	regulation of cell cycle process
GO:0006915	0.000992659	113.917	0.0559541	2	26	apoptotic process
GO:0050794	0.00106216	Inf	5.05724	10	751	regulation of cellular process
GO:0007093	0.00143361	52.4286	0.0606061	2	9	mitotic cell cycle checkpoint
GO:0008637	0.00143361	52.4286	0.0606061	2	9	apoptotic mitochondrial changes
GO:0072331	0.00143361	52.4286	0.0606061	2	9	signal transduction by p53 class mediator
GO:0006974	0.00176074	11.1807	0.585859	4	87	cellular response to DNA damage stimulus
GO:0030162	0.00177074	17.131	0.262626	3	39	regulation of proteolysis
GO:0002562	0.00178556	45.8438	0.0673401	2	10	somatic diversification of immune receptors via germline recombination within a single locus
GO:0044843	0.00178556	45.8438	0.0673401	2	10	cell cycle G1/S phase transition
GO:0090150	0.00178556	45.8438	0.0673401	2	10	establishment of protein localization to membrane
GO:0071478	0.0021745	40.7222	0.0740741	2	11	cellular response to radiation
GO:0042981	0.00287027	40.4348	0.0878426	2	25	regulation of apoptotic process
GO:0065007	0.00301178	Inf	5.60943	10	833	biological regulation
GO:0097191	0.00355912	30.4792	0.0942761	2	14	extrinsic apoptotic signaling pathway
GO:1901988	0.00355912	30.4792	0.0942761	2	14	negative regulation of cell cycle phase transition
GO:0051051	0.0052619	24.3333	0.114478	2	17	negative regulation of transport
GO:0043523	0.00589833	22.7969	0.121212	2	18	regulation of neuron apoptotic process
GO:0051604	0.00589833	22.7969	0.121212	2	18	protein maturation
GO:2001233	0.00656853	21.4412	0.127946	2	19	regulation of apoptotic signaling pathway
GO:0048518	0.00664093	6	2.02694	6	301	positive regulation of biological process
GO:0002087	0.00673401	Inf	0.00673401	1	1	regulation of respiratory gaseous exchange by neurological system process
GO:0002368	0.00673401	Inf	0.00673401	1	1	B cell cytokine production
GO:0002831	0.00673401	Inf	0.00673401	1	1	regulation of response to biotic stimulus
GO:0002836	0.00673401	Inf	0.00673401	1	1	positive regulation of response to tumor cell
GO:0002837	0.00673401	Inf	0.00673401	1	1	regulation of immune response to tumor cell
GO:0002842	0.00673401	Inf	0.00673401	1	1	positive regulation of T cell mediated immune response to tumor cell
GO:0003016	0.00673401	Inf	0.00673401	1	1	respiratory system process
GO:0006626	0.00673401	Inf	0.00673401	1	1	protein targeting to mitochondrion
GO:0017055	0.00673401	Inf	0.00673401	1	1	negative regulation of RNA polymerase II transcriptional preinitiation complex assembly
GO:0019050	0.00673401	Inf	0.00673401	1	1	suppression by virus of host apoptotic process
GO:0019054	0.00673401	Inf	0.00673401	1	1	modulation by virus of host process
GO:0031065	0.00673401	Inf	0.00673401	1	1	positive regulation of histone deacetylation
GO:0032727	0.00673401	Inf	0.00673401	1	1	positive regulation of interferon-alpha production
GO:0032733	0.00673401	Inf	0.00673401	1	1	positive regulation of interleukin-10 production
GO:0042026	0.00673401	Inf	0.00673401	1	1	protein refolding
GO:0043032	0.00673401	Inf	0.00673401	1	1	positive regulation of macrophage activation
GO:0043576	0.00673401	Inf	0.00673401	1	1	regulation of respiratory gaseous exchange
GO:0044532	0.00673401	Inf	0.00673401	1	1	modulation of apoptotic process in other organism
GO:0046898	0.00673401	Inf	0.00673401	1	1	response to cycloheximide
GO:0051534	0.00673401	Inf	0.00673401	1	1	negative regulation of NFAT protein import into nucleus
GO:0052041	0.00673401	Inf	0.00673401	1	1	negative regulation by symbiont of host programmed cell death
GO:0052150	0.00673401	Inf	0.00673401	1	1	modulation by symbiont of host apoptotic process
GO:0052248	0.00673401	Inf	0.00673401	1	1	modulation of programmed cell death in other organism involved in symbiotic interaction
GO:0060154	0.00673401	Inf	0.00673401	1	1	cellular process regulating host cell cycle in response to virus
GO:0071839	0.00673401	Inf	0.00673401	1	1	apoptotic process in bone marrow
GO:0090005	0.00673401	Inf	0.00673401	1	1	negative regulation of establishment of protein localization to plasma membrane
GO:0090200	0.00673401	Inf	0.00673401	1	1	positive regulation of release of cytochrome c from mitochondria
GO:0090311	0.00673401	Inf	0.00673401	1	1	regulation of protein deacetylation
GO:0097284	0.00673401	Inf	0.00673401	1	1	hepatocyte apoptotic process
GO:2000426	0.00673401	Inf	0.00673401	1	1	negative regulation of apoptotic cell clearance
GO:0070997	0.00800865	19.1579	0.141414	2	21	neuron death
GO:0051128	0.00865883	6.89744	0.902357	4	134	regulation of cellular component organization
GO:0051259	0.00877781	18.1875	0.148148	2	22	protein oligomerization
GO:1902580	0.00957919	17.3095	0.154882	2	23	single-organism cellular localization
GO:0006950	0.00966928	5.76606	1.50168	5	223	response to stress
GO:0051716	0.00988061	5.57854	2.97643	7	442	cellular response to stimulus

## Sheet: III
GOBPID	Pvalue	OddsRatio	ExpCount	Count	Size	Term
GO:0006974	0.000160307	47.5227	0.12298	3	25	cellular response to DNA damage stimulus
GO:0006950	0.00133069	8.69585	1.50168	6	223	response to stress
GO:0072331	0.00143361	52.4286	0.0606061	2	9	signal transduction by p53 class mediator
GO:0090304	0.00187999	9.11111	3.08418	8	458	nucleic acid metabolic process
GO:1901360	0.00203704	13.0882	4.10774	9	610	organic cyclic compound metabolic process
GO:0007050	0.00306169	33.2727	0.0875421	2	13	cell cycle arrest
GO:0045926	0.00465962	26.0893	0.107744	2	16	negative regulation of growth
GO:0044260	0.00527161	10.6958	4.59933	9	683	cellular macromolecule metabolic process
GO:0051726	0.00531398	11.2778	0.383838	3	57	regulation of cell cycle
GO:0006235	0.00673401	Inf	0.00673401	1	1	dTTP biosynthetic process
GO:0006272	0.00673401	Inf	0.00673401	1	1	leading strand elongation
GO:0007289	0.00673401	Inf	0.00673401	1	1	spermatid nucleus differentiation
GO:0009202	0.00673401	Inf	0.00673401	1	1	deoxyribonucleoside triphosphate biosynthetic process
GO:0009211	0.00673401	Inf	0.00673401	1	1	pyrimidine deoxyribonucleoside triphosphate metabolic process
GO:0009219	0.00673401	Inf	0.00673401	1	1	pyrimidine deoxyribonucleotide metabolic process
GO:0009265	0.00673401	Inf	0.00673401	1	1	2'-deoxyribonucleotide biosynthetic process
GO:0030263	0.00673401	Inf	0.00673401	1	1	apoptotic chromosome condensation
GO:0032077	0.00673401	Inf	0.00673401	1	1	positive regulation of deoxyribonuclease activity
GO:0072395	0.00673401	Inf	0.00673401	1	1	signal transduction involved in cell cycle checkpoint
GO:0072422	0.00673401	Inf	0.00673401	1	1	signal transduction involved in DNA damage checkpoint
GO:0072431	0.00673401	Inf	0.00673401	1	1	signal transduction involved in mitotic G1 DNA damage checkpoint
GO:1902403	0.00673401	Inf	0.00673401	1	1	signal transduction involved in mitotic DNA integrity checkpoint
GO:0006281	0.0067458	10.2857	0.417508	3	62	DNA repair
GO:0044238	0.00872683	Inf	6.23569	10	926	primary metabolic process
GO:0071103	0.00957919	17.3095	0.154882	2	23	DNA conformation change

## Sheet: IV
GOBPID	Pvalue	OddsRatio	ExpCount	Count	Size	Term
GO:0007219	5.68486e-06	176.64	0.0430976	3	8	Notch signaling pathway
GO:1902679	1.43328e-05	33.5	0.40404	5	75	negative regulation of RNA biosynthetic process
GO:0048562	1.90559e-05	45.1562	0.193939	4	36	embryonic organ morphogenesis
GO:0045934	2.10538e-05	30.7237	0.436364	5	81	negative regulation of nucleobase-containing compound metabolic process
GO:2000113	2.52344e-05	29.4937	0.452525	5	84	negative regulation of cellular macromolecule biosynthetic process
GO:0009890	3.00428e-05	28.3537	0.468687	5	87	negative regulation of biosynthetic process
GO:0010629	3.75447e-05	26.9574	0.490236	5	91	negative regulation of gene expression
GO:0000122	4.31496e-05	35.925	0.237037	4	44	negative regulation of transcription from RNA polymerase II promoter
GO:0045596	5.16415e-05	34.1667	0.247811	4	46	negative regulation of cell differentiation
GO:0001655	0.000223596	39.6818	0.13468	3	25	urogenital system development
GO:0001947	0.000252062	163.778	0.026936	2	5	heart looping
GO:0048705	0.000282907	36.325	0.145455	3	27	skeletal system morphogenesis
GO:0003007	0.000351613	33.4846	0.156229	3	29	heart morphogenesis
GO:0001756	0.000377073	122.75	0.0323232	2	6	somitogenesis
GO:0032330	0.000526478	98.1333	0.0377104	2	7	regulation of chondrocyte differentiation
GO:0035050	0.000526478	98.1333	0.0377104	2	7	embryonic heart tube development
GO:0072358	0.000831992	15.5955	0.50101	4	93	cardiovascular system development
GO:0007368	0.00111905	61.2083	0.0538721	2	10	determination of left/right symmetry
GO:0006874	0.00163242	48.9	0.0646465	2	12	cellular calcium ion homeostasis
GO:0009799	0.00163242	48.9	0.0646465	2	12	specification of symmetry
GO:0048565	0.00163242	48.9	0.0646465	2	12	digestive tract development
GO:2000026	0.0017534	12.5505	0.608754	4	113	regulation of multicellular organismal development
GO:0002244	0.00192402	44.4242	0.0700337	2	13	hematopoietic progenitor cell differentiation
GO:0006355	0.00207719	10.7609	1.767	6	328	regulation of transcription, DNA-templated
GO:0001933	0.00223862	40.6944	0.0754209	2	14	negative regulation of protein phosphorylation
GO:0002573	0.00223862	40.6944	0.0754209	2	14	myeloid leukocyte differentiation
GO:0021537	0.00223862	40.6944	0.0754209	2	14	telencephalon development
GO:0022603	0.00236135	16.4423	0.296296	3	55	regulation of anatomical structure morphogenesis
GO:0051252	0.00249624	10.3063	1.82626	6	339	regulation of RNA metabolic process
GO:0042176	0.00257604	37.5385	0.0808081	2	15	regulation of protein catabolic process
GO:0007420	0.00275583	15.5127	0.312458	3	58	brain development
GO:0007423	0.00289597	15.225	0.317845	3	59	sensory organ development
GO:0002682	0.00304051	14.9474	0.323232	3	60	regulation of immune system process
GO:0001657	0.00331857	32.4889	0.0915825	2	17	ureteric bud development
GO:0016485	0.00331857	32.4889	0.0915825	2	17	protein processing
GO:0021953	0.00331857	32.4889	0.0915825	2	17	central nervous system neuron differentiation
GO:0072163	0.00331857	32.4889	0.0915825	2	17	mesonephric epithelium development
GO:0002520	0.00334303	14.4203	0.334007	3	62	immune system development
GO:0010556	0.0036459	9.41176	1.95556	6	363	regulation of macromolecule biosynthetic process
GO:0030326	0.0037233	30.4375	0.0969697	2	18	embryonic limb morphogenesis
GO:0072507	0.0037233	30.4375	0.0969697	2	18	divalent inorganic cation homeostasis
GO:0031326	0.00411094	9.13973	1.99865	6	371	regulation of cellular biosynthetic process
GO:0034654	0.00423425	9.07357	2.00943	6	373	nucleobase-containing compound biosynthetic process
GO:0010769	0.00459873	27.0185	0.107744	2	20	regulation of cell morphogenesis involved in differentiation
GO:0045936	0.00459873	27.0185	0.107744	2	20	negative regulation of phosphate metabolic process
GO:0048585	0.00473932	12.6269	0.377104	3	70	negative regulation of response to stimulus
GO:0001822	0.00506906	25.5789	0.113131	2	21	kidney development
GO:0035107	0.00506906	25.5789	0.113131	2	21	appendage morphogenesis
GO:0001921	0.00538721	Inf	0.00538721	1	1	positive regulation of receptor recycling
GO:0007175	0.00538721	Inf	0.00538721	1	1	negative regulation of epidermal growth factor-activated receptor activity
GO:0007220	0.00538721	Inf	0.00538721	1	1	Notch receptor processing
GO:0015871	0.00538721	Inf	0.00538721	1	1	choline transport
GO:0016080	0.00538721	Inf	0.00538721	1	1	synaptic vesicle targeting
GO:0019049	0.00538721	Inf	0.00538721	1	1	evasion or tolerance of host defenses by virus
GO:0021756	0.00538721	Inf	0.00538721	1	1	striatum development
GO:0021870	0.00538721	Inf	0.00538721	1	1	Cajal-Retzius cell differentiation
GO:0021904	0.00538721	Inf	0.00538721	1	1	dorsal/ventral neural tube patterning
GO:0030878	0.00538721	Inf	0.00538721	1	1	thyroid gland development
GO:0035413	0.00538721	Inf	0.00538721	1	1	positive regulation of catenin import into nucleus
GO:0035854	0.00538721	Inf	0.00538721	1	1	eosinophil fate commitment
GO:0044413	0.00538721	Inf	0.00538721	1	1	avoidance of host defenses
GO:0048340	0.00538721	Inf	0.00538721	1	1	paraxial mesoderm morphogenesis
GO:0050820	0.00538721	Inf	0.00538721	1	1	positive regulation of coagulation
GO:0051563	0.00538721	Inf	0.00538721	1	1	smooth endoplasmic reticulum calcium ion homeostasis
GO:0051834	0.00538721	Inf	0.00538721	1	1	evasion or tolerance of defenses of other organism involved in symbiotic interaction
GO:0051966	0.00538721	Inf	0.00538721	1	1	regulation of synaptic transmission, glutamatergic
GO:0052173	0.00538721	Inf	0.00538721	1	1	response to defenses of other organism involved in symbiotic interaction
GO:0055012	0.00538721	Inf	0.00538721	1	1	ventricular cardiac muscle cell differentiation
GO:0060075	0.00538721	Inf	0.00538721	1	1	regulation of resting membrane potential
GO:0061037	0.00538721	Inf	0.00538721	1	1	negative regulation of cartilage development
GO:0070345	0.00538721	Inf	0.00538721	1	1	negative regulation of fat cell proliferation
GO:0075136	0.00538721	Inf	0.00538721	1	1	response to host
GO:0097154	0.00538721	Inf	0.00538721	1	1	GABAergic neuron differentiation
GO:1901313	0.00538721	Inf	0.00538721	1	1	positive regulation of gene expression involved in extracellular matrix organization
GO:1903053	0.00538721	Inf	0.00538721	1	1	regulation of extracellular matrix organization
GO:2000059	0.00538721	Inf	0.00538721	1	1	negative regulation of protein ubiquitination involved in ubiquitin-dependent protein catabolic process
GO:2000977	0.00538721	Inf	0.00538721	1	1	regulation of forebrain neuron differentiation
GO:0048732	0.00543561	25.287	0.117925	2	25	gland development
GO:0030003	0.00556088	24.2833	0.118519	2	22	cellular cation homeostasis
GO:0051098	0.00556088	24.2833	0.118519	2	22	regulation of binding
GO:0048468	0.00558371	8.84667	0.82963	4	154	cell development
GO:0051171	0.00563618	8.44961	2.11717	6	393	regulation of nitrogen compound metabolic process
GO:0045944	0.00668818	11.0605	0.425589	3	79	positive regulation of transcription from RNA polymerase II promoter
GO:0055065	0.00716344	21.0725	0.13468	2	25	metal ion homeostasis
GO:0055082	0.00716344	21.0725	0.13468	2	25	cellular chemical homeostasis
GO:0040007	0.00769032	10.4775	0.447138	3	83	growth
GO:0050673	0.00773939	20.1806	0.140067	2	26	epithelial cell proliferation
GO:0060562	0.00773939	20.1806	0.140067	2	26	epithelial tube morphogenesis
GO:0050794	0.00830521	Inf	3.53774	7	750	regulation of cellular process
GO:0043065	0.0083359	19.36	0.145455	2	27	positive regulation of apoptotic process
GO:0060173	0.0083359	19.36	0.145455	2	27	limb development
GO:0010942	0.00895282	18.6026	0.150842	2	28	positive regulation of cell death
GO:0042110	0.00895282	18.6026	0.150842	2	28	T cell activation
GO:0043067	0.00935738	9.70465	0.479461	3	89	regulation of programmed cell death
GO:0009792	0.00958994	17.9012	0.156229	2	29	embryo development ending in birth or egg hatching
GO:0065007	0.00965848	Inf	4.48754	8	833	biological regulation
GO:0042592	0.00995783	9.47045	0.490236	3	91	homeostatic process

## Sheet: V
GOBPID	Pvalue	OddsRatio	ExpCount	Count	Size	Term
GO:0032502	5.68807e-06	Inf	3.0101	10	447	developmental process
GO:0032501	1.65925e-05	Inf	3.3468	10	497	multicellular organismal process
GO:0007399	1.80892e-05	19.1771	1.12458	7	167	nervous system development
GO:0060021	1.81157e-05	104.929	0.0606061	3	9	palate development
GO:0008406	1.97016e-05	40.3056	0.188552	4	28	gonad development
GO:0007548	3.41504e-05	34.4524	0.215488	4	32	sex differentiation
GO:0061458	5.52099e-05	30.0625	0.242424	4	36	reproductive system development
GO:0055123	7.71176e-05	57.039	0.0942761	3	14	digestive system development
GO:0007275	0.000119507	Inf	1.34006	6	310	multicellular organismal development
GO:0009887	0.000137397	16.5595	0.599327	5	89	organ morphogenesis
GO:0043588	0.000142535	44.7245	0.114478	3	17	skin development
GO:0030335	0.000201669	39.0804	0.127946	3	19	positive regulation of cell migration
GO:0040017	0.000201669	39.0804	0.127946	3	19	positive regulation of locomotion
GO:0001942	0.000243279	184.125	0.026936	2	4	hair follicle development
GO:0003198	0.000243279	184.125	0.026936	2	4	epithelial to mesenchymal transition involved in endocardial cushion formation
GO:0022404	0.000243279	184.125	0.026936	2	4	molting cycle process
GO:0051272	0.000274833	34.6905	0.141414	3	21	positive regulation of cellular component movement
GO:0003203	0.000404006	122.667	0.03367	2	5	endocardial cushion morphogenesis
GO:0042633	0.000404006	122.667	0.03367	2	5	hair cycle
GO:0045684	0.000404006	122.667	0.03367	2	5	positive regulation of epidermis development
GO:0048536	0.000404006	122.667	0.03367	2	5	spleen development
GO:0048566	0.000404006	122.667	0.03367	2	5	embryonic digestive tract development
GO:0009891	0.000671768	11.395	0.835017	5	124	positive regulation of biosynthetic process
GO:0022414	0.000686522	14.6979	0.457912	4	68	reproductive process
GO:0009790	0.00105302	12.9907	0.511785	4	76	embryo development
GO:0050794	0.00106216	Inf	5.05724	10	751	regulation of cellular process
GO:0007178	0.00108011	20.6429	0.222222	3	33	transmembrane receptor protein serine/threonine kinase signaling pathway
GO:2000145	0.00139838	18.7273	0.242424	3	36	regulation of cell motility
GO:0060070	0.00139919	53.6667	0.0600273	2	11	canonical Wnt signaling pathway
GO:0009967	0.00168544	11.3252	0.579125	4	86	positive regulation of signal transduction
GO:0030154	0.00182153	24.3858	0.716322	4	201	cell differentiation
GO:0030308	0.0021745	40.7222	0.0740741	2	11	negative regulation of cell growth
GO:0072358	0.0022634	10.382	0.626263	4	93	cardiovascular system development
GO:0042493	0.00260001	36.625	0.0808081	2	12	response to drug
GO:0051781	0.00260001	36.625	0.0808081	2	12	positive regulation of cell division
GO:0010556	0.00295286	7.33427	2.44444	7	363	regulation of macromolecule biosynthetic process
GO:0065007	0.00301178	Inf	5.60943	10	833	biological regulation
GO:0007050	0.00306169	33.2727	0.0875421	2	13	cell cycle arrest
GO:0010604	0.00338618	7.62573	1.18519	5	176	positive regulation of macromolecule metabolic process
GO:0048729	0.00344382	13.3137	0.329966	3	49	tissue morphogenesis
GO:0097191	0.00355912	30.4792	0.0942761	2	14	extrinsic apoptotic signaling pathway
GO:0030855	0.00365049	13.0213	0.3367	3	50	epithelial cell differentiation
GO:0045893	0.00381558	8.88026	0.720539	4	107	positive regulation of transcription, DNA-templated
GO:0045597	0.00408659	12.4723	0.350168	3	52	positive regulation of cell differentiation
GO:0001501	0.00431621	12.2143	0.356902	3	53	skeletal system development
GO:0040008	0.00431621	12.2143	0.356902	3	53	regulation of growth
GO:0019438	0.0043958	6.72368	2.60606	7	387	aromatic compound biosynthetic process
GO:0035295	0.00479907	11.728	0.37037	3	55	tube development
GO:1901362	0.0049869	6.53694	2.65993	7	395	organic cyclic compound biosynthetic process
GO:0006915	0.0052983	8.0354	0.787879	4	117	apoptotic process
GO:0016049	0.00564193	24.1	0.119403	2	22	cell growth
GO:0045935	0.00635677	7.59664	0.828283	4	123	positive regulation of nucleobase-containing compound metabolic process
GO:0032879	0.00654627	7.52778	0.835017	4	124	regulation of localization
GO:0001837	0.00656853	21.4412	0.127946	2	19	epithelial to mesenchymal transition
GO:0060828	0.00656853	21.4412	0.127946	2	19	regulation of canonical Wnt signaling pathway
GO:0010693	0.00673401	Inf	0.00673401	1	1	negative regulation of alkaline phosphatase activity
GO:0010936	0.00673401	Inf	0.00673401	1	1	negative regulation of macrophage cytokine production
GO:0032570	0.00673401	Inf	0.00673401	1	1	response to progesterone
GO:0042416	0.00673401	Inf	0.00673401	1	1	dopamine biosynthetic process
GO:0045726	0.00673401	Inf	0.00673401	1	1	positive regulation of integrin biosynthetic process
GO:0045823	0.00673401	Inf	0.00673401	1	1	positive regulation of heart contraction
GO:0046880	0.00673401	Inf	0.00673401	1	1	regulation of follicle-stimulating hormone secretion
GO:0060166	0.00673401	Inf	0.00673401	1	1	olfactory pit development
GO:0060197	0.00673401	Inf	0.00673401	1	1	cloacal septation
GO:0072138	0.00673401	Inf	0.00673401	1	1	mesenchymal cell proliferation involved in ureteric bud development
GO:0072198	0.00673401	Inf	0.00673401	1	1	mesenchymal cell proliferation involved in ureter development
GO:0090037	0.00673401	Inf	0.00673401	1	1	positive regulation of protein kinase C signaling
GO:0090131	0.00673401	Inf	0.00673401	1	1	mesenchyme migration
GO:2001241	0.00673401	Inf	0.00673401	1	1	positive regulation of extrinsic apoptotic signaling pathway in absence of ligand
GO:0008219	0.00673961	7.46006	0.841751	4	125	cell death
GO:0002520	0.0067458	10.2857	0.417508	3	62	immune system development
GO:0008283	0.00842921	6.95607	0.895623	4	133	cell proliferation
GO:0048762	0.00877781	18.1875	0.148148	2	22	mesenchymal cell differentiation
GO:0050678	0.00877781	18.1875	0.148148	2	22	regulation of epithelial cell proliferation
GO:0009888	0.00907838	10.4141	0.482591	3	99	tissue development

## Sheet: VI
GOBPID	Pvalue	OddsRatio	ExpCount	Count	Size	Term
GO:0006936	4.43929e-07	129.778	0.079161	4	9	muscle contraction
GO:0003008	2.4732e-05	16.3333	0.695951	6	78	system process
GO:0006937	3.50459e-05	84.5192	0.0754209	3	7	regulation of muscle contraction
GO:0044707	0.000118052	Inf	1.93401	7	381	single-multicellular organism process
GO:0003009	0.000324661	209.714	0.0323232	2	3	skeletal muscle contraction
GO:0050879	0.000324661	209.714	0.0323232	2	3	multicellular organismal movement
GO:0007517	0.000431029	14.9688	0.387879	4	36	muscle organ development
GO:0003229	0.00106863	69.8095	0.0538721	2	5	ventricular cardiac muscle tissue development
GO:0097306	0.00106863	69.8095	0.0538721	2	5	cellular response to alcohol
GO:0003208	0.00221599	41.8286	0.0754209	2	7	cardiac ventricle morphogenesis
GO:0044057	0.00285522	13.3292	0.301684	3	28	regulation of system process
GO:0033993	0.00688176	9.45495	0.409428	3	38	response to lipid
GO:0014706	0.00740606	9.1859	0.420202	3	39	striated muscle tissue development
